# Supplementary material
Source: publisher site journal article supplement (https://www.dovepress.com/article/608363)
Supplement: Supplementary file 1 [file 608363_Figure%20S1-S6.docx]

**
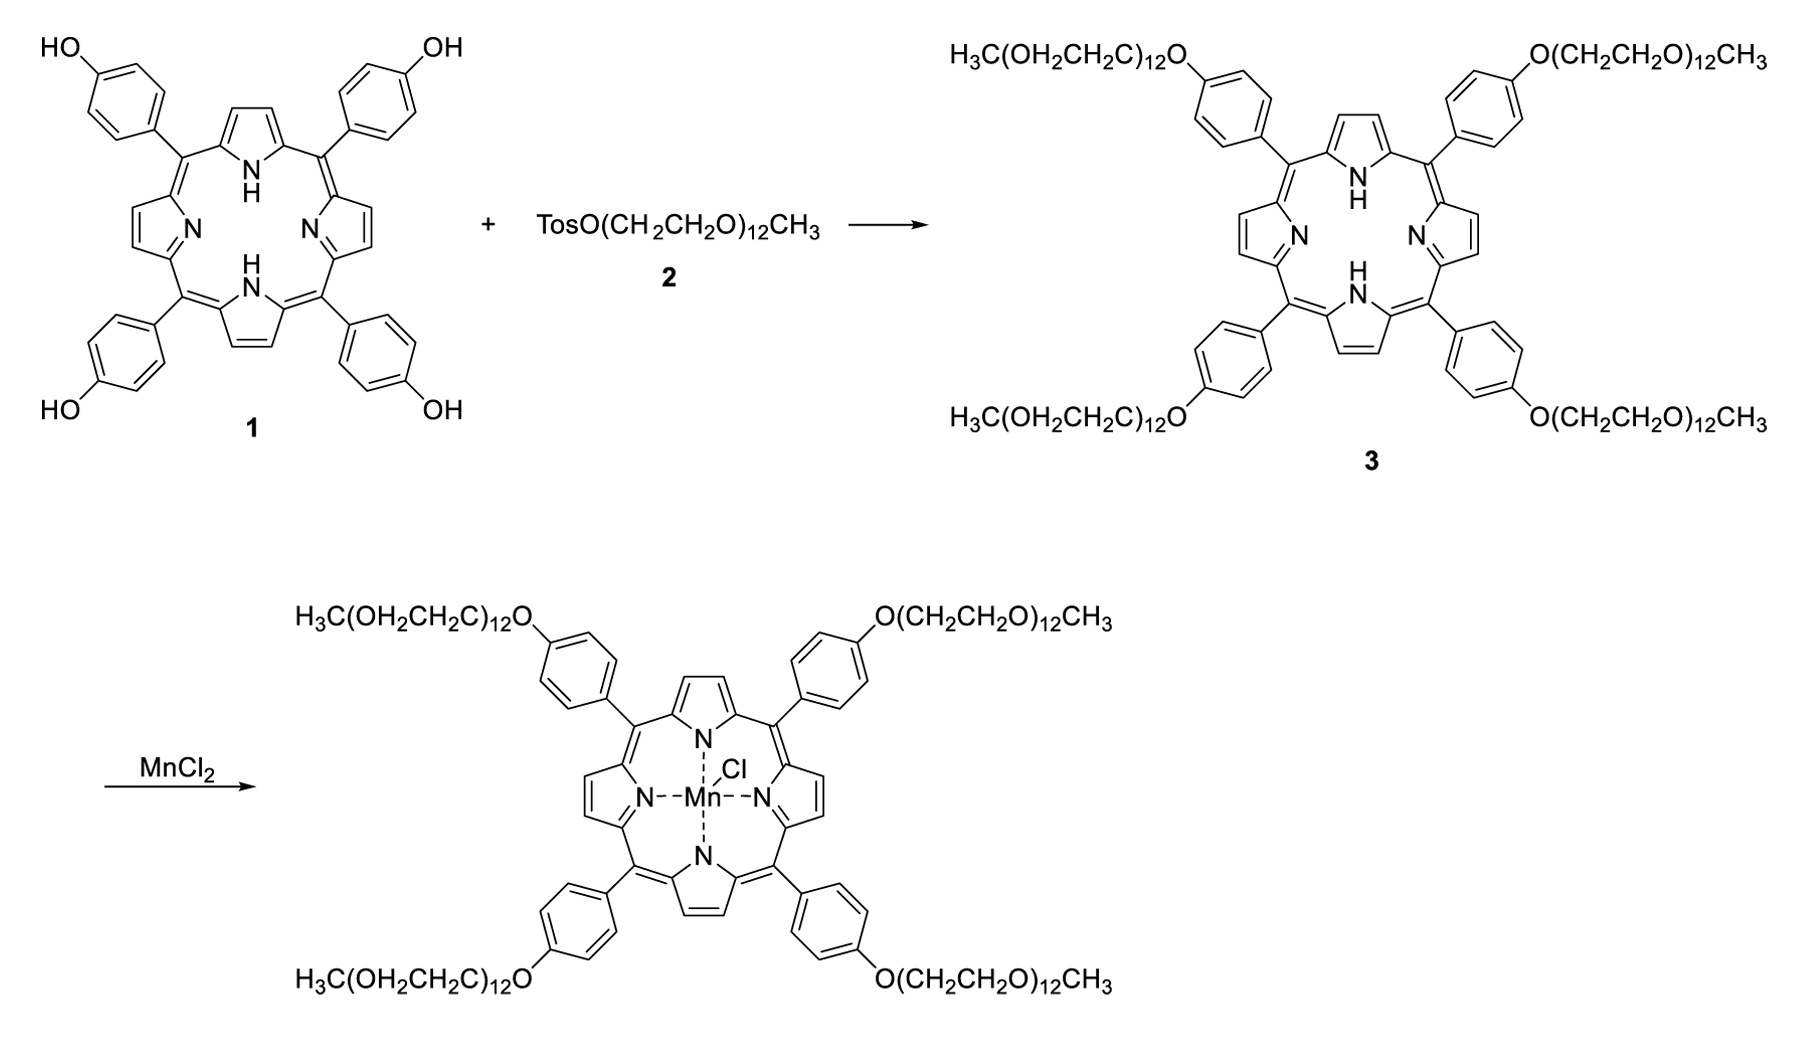
**

**Figure S1** The synthetic route of Mn-THPPmPEG12.


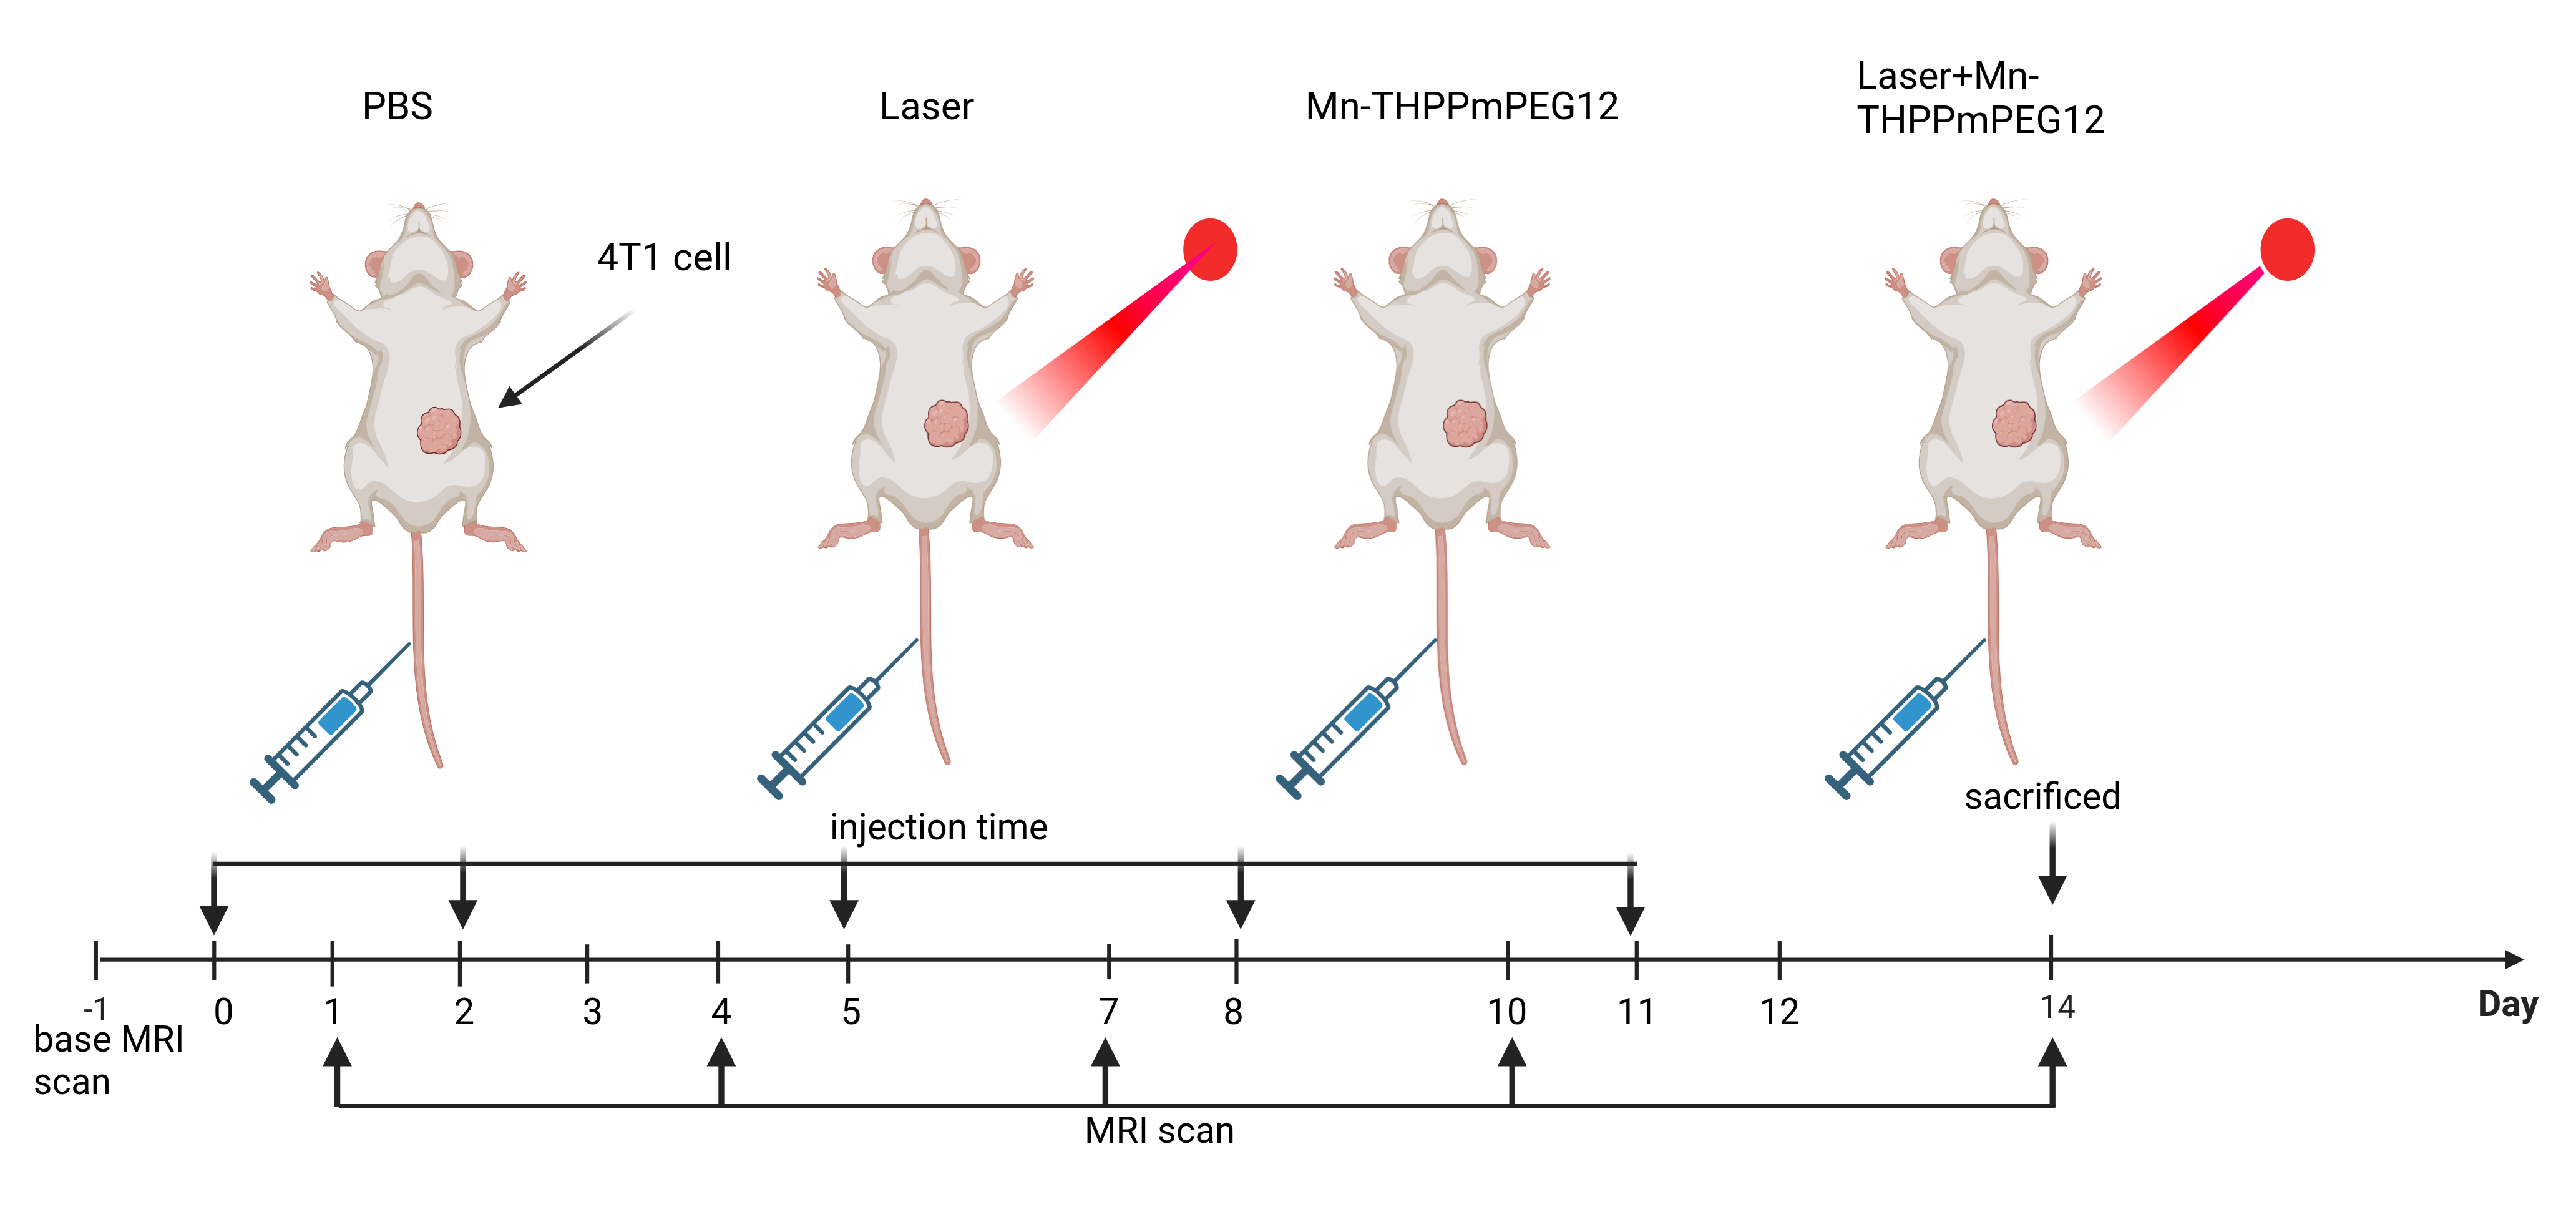


**Figure S2** Therapeutic protocol of Mn-THPPmPEG12-Mediated PDT in primary TNBC mouse model, along with dynamic MRI assessment.


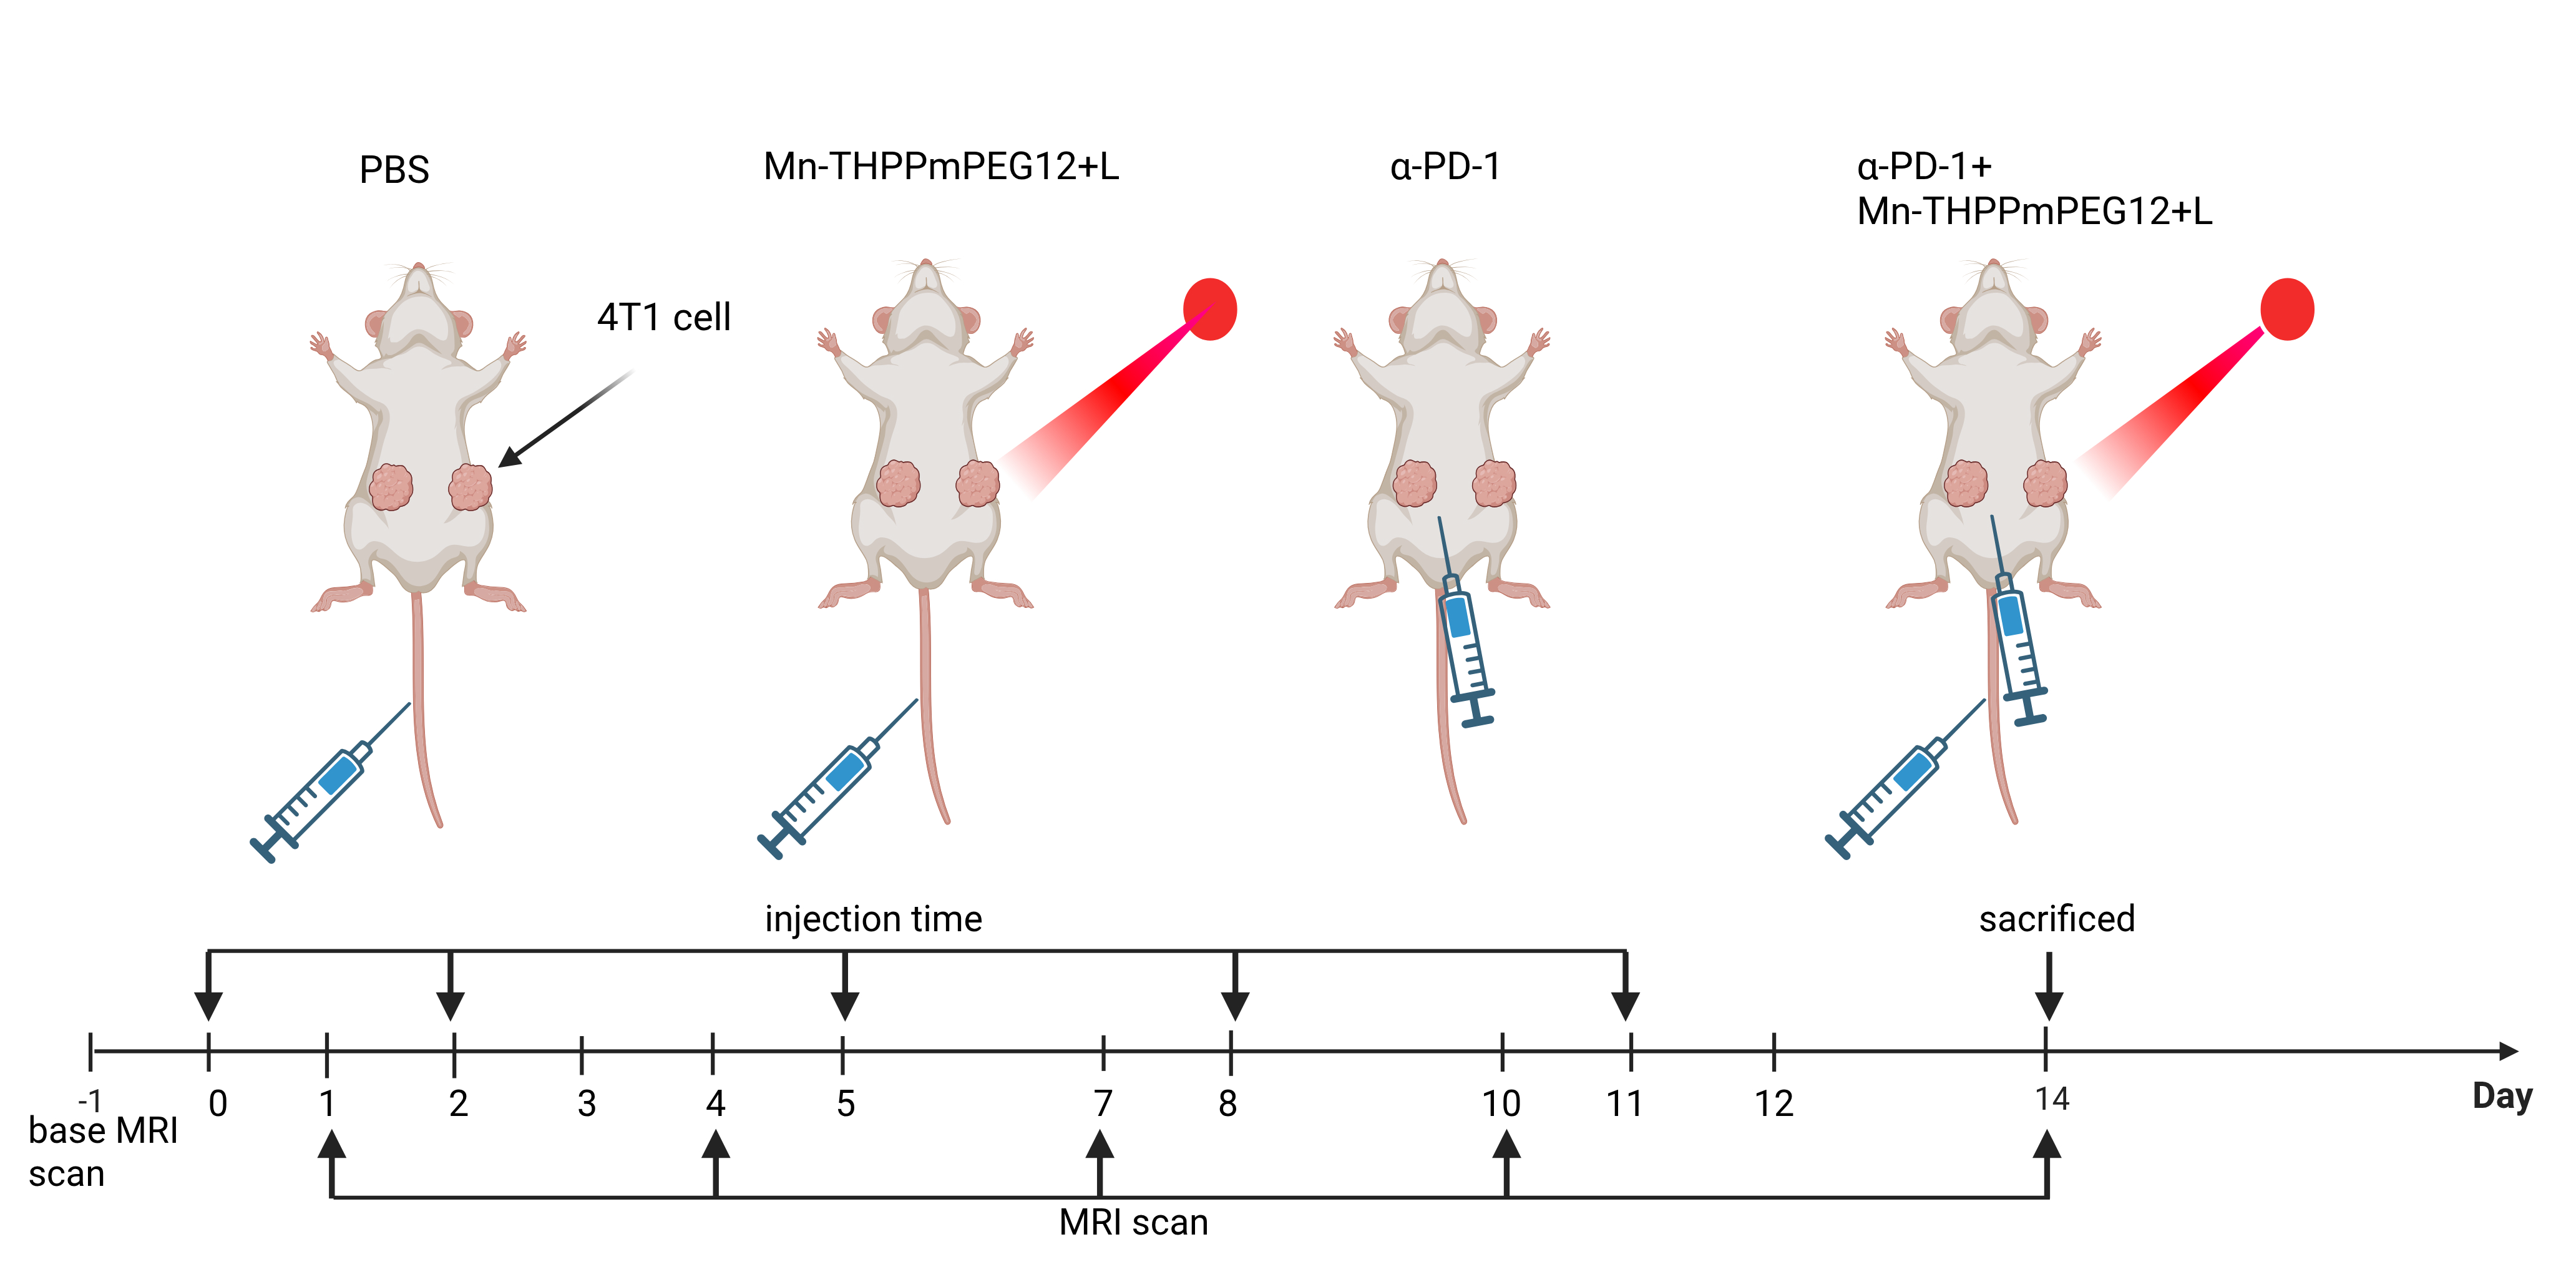


**Figure S3** Therapeutic protocol of combination therapy (PDT + anti-PD-1) in bilateral TNBC mouse model, along with dynamic MRI assessment.


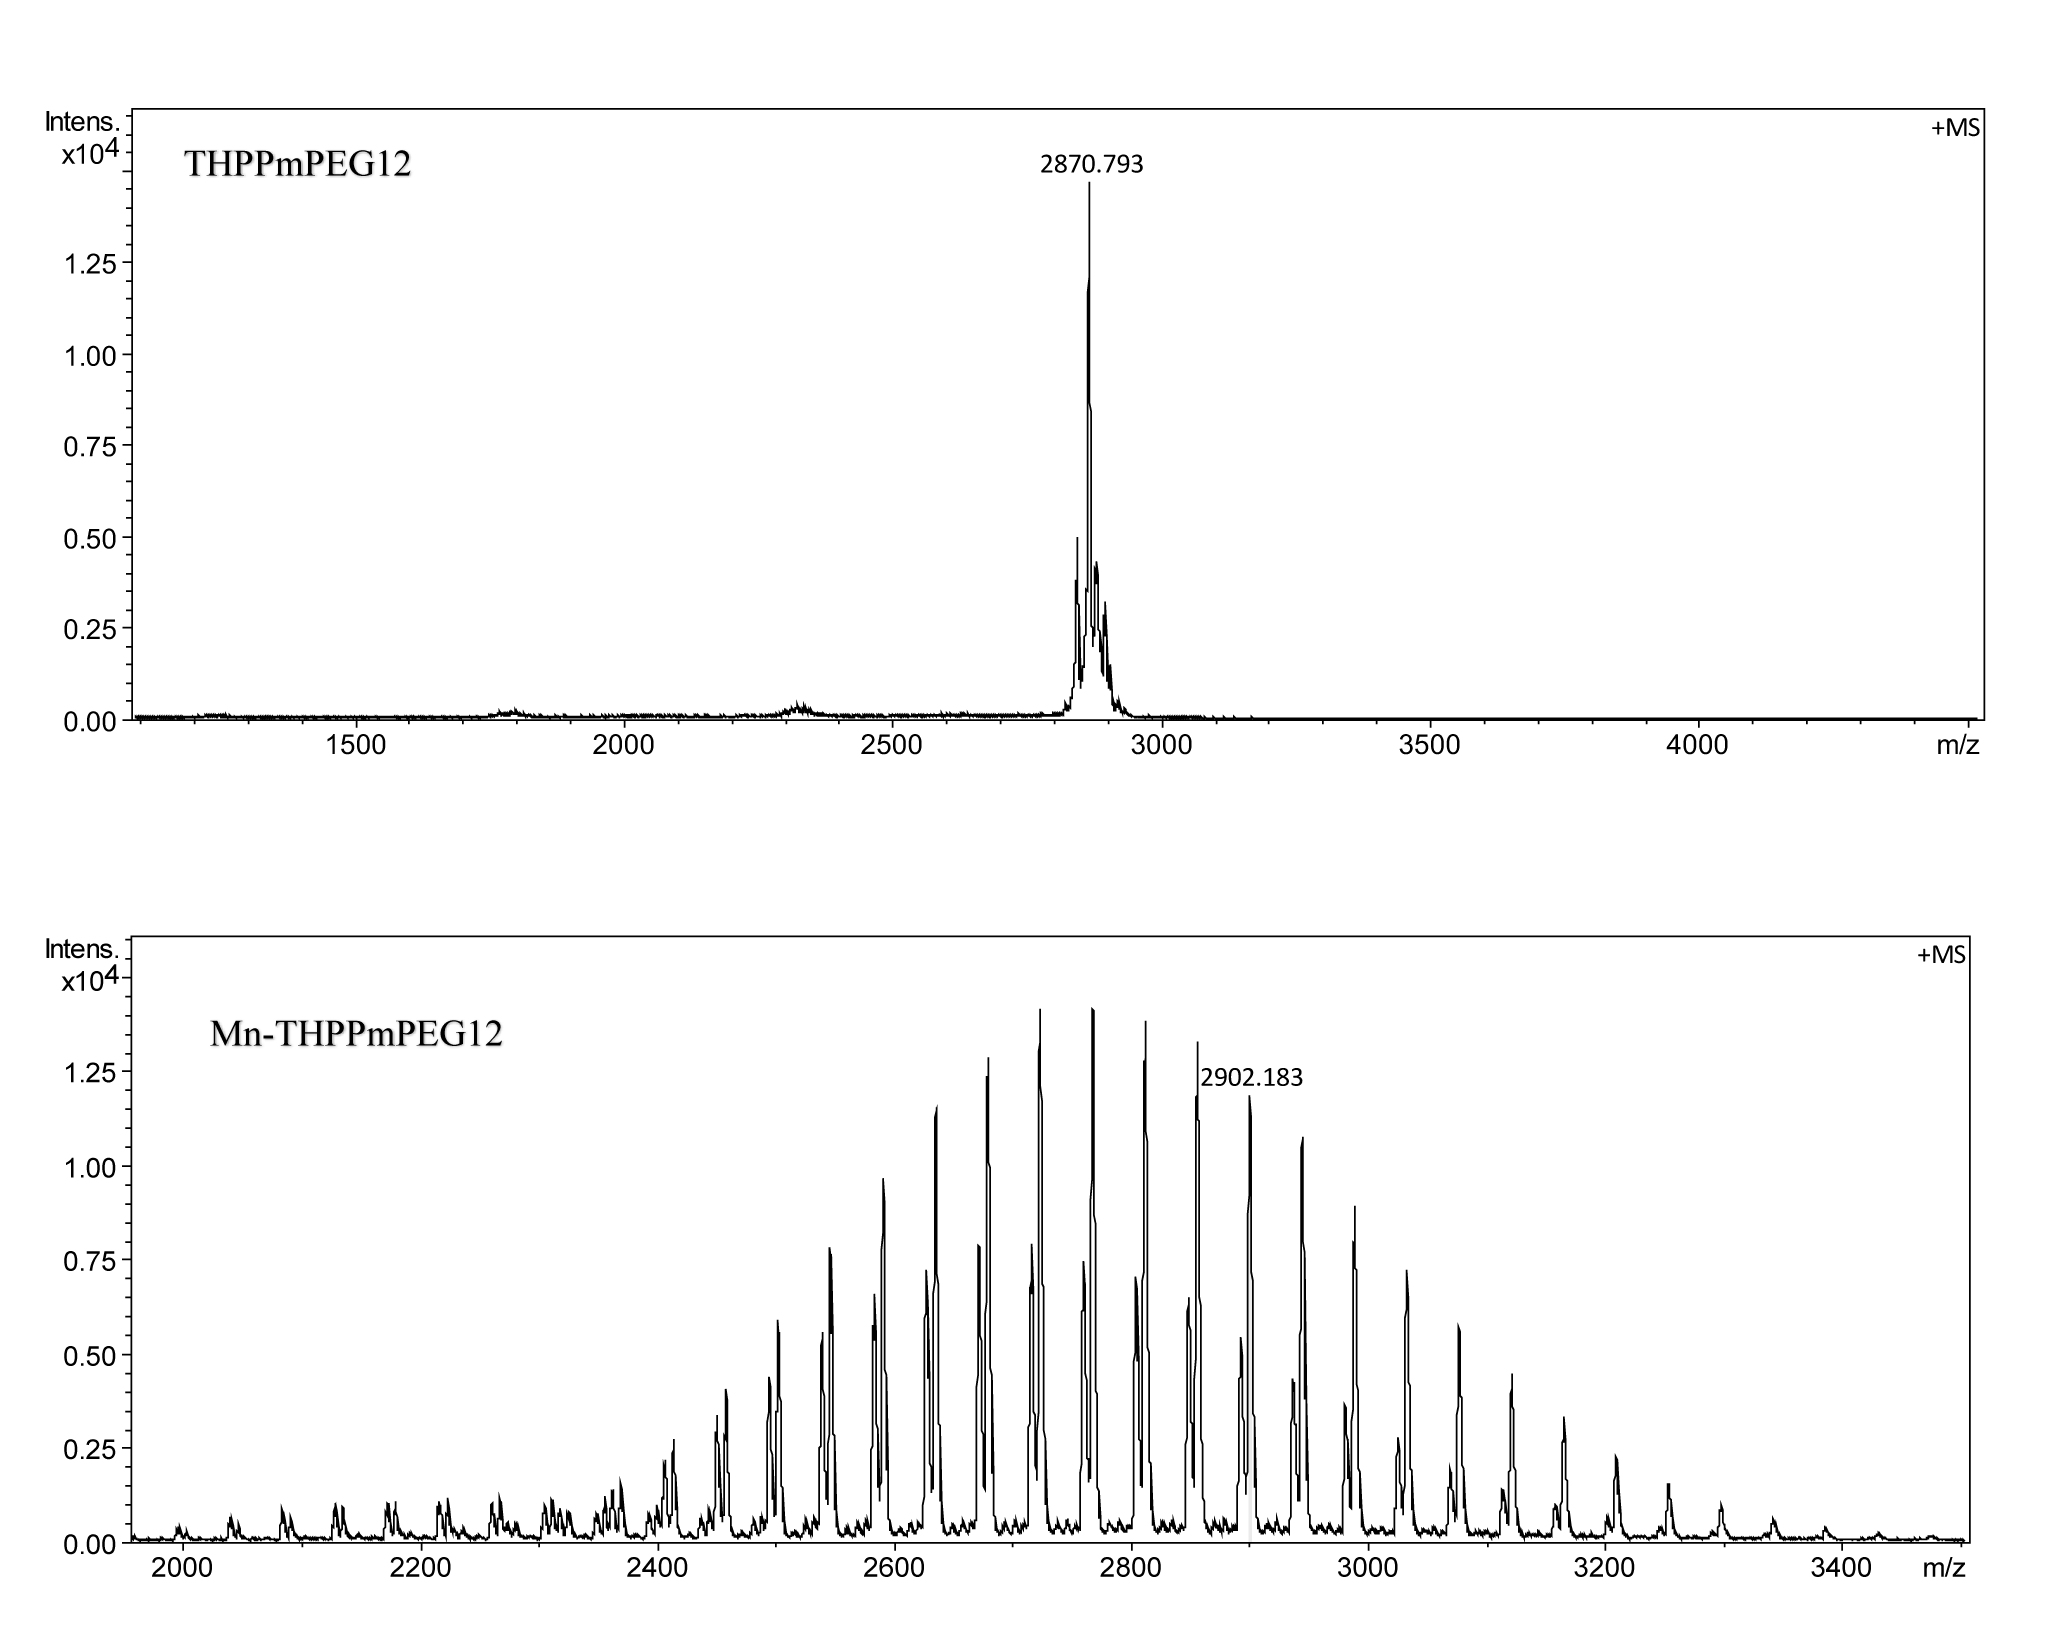


**Figure S4** Mass spectra of THPPmPEG12 and Mn-THPPmPEG12.


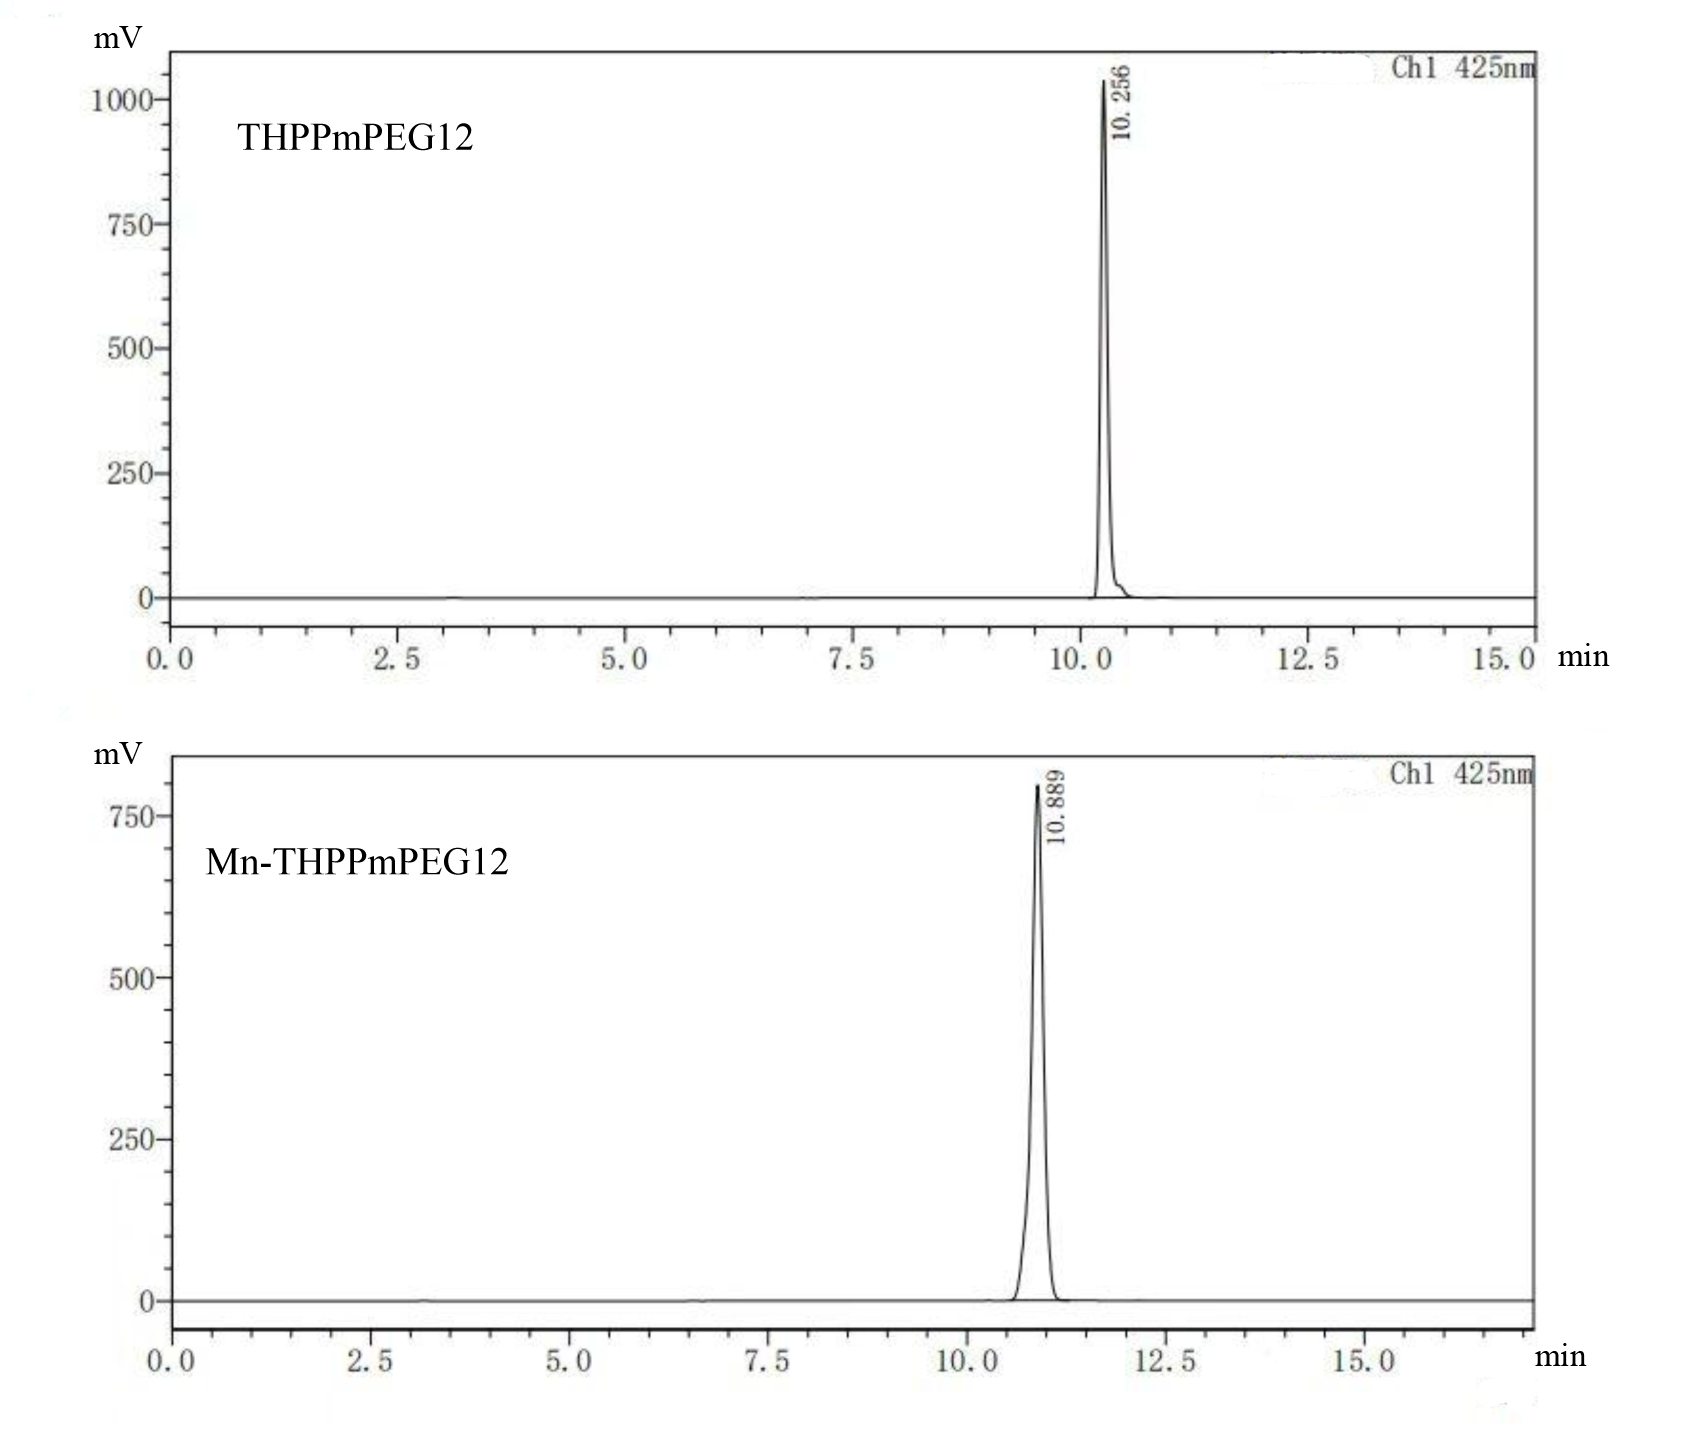


**Figure S5** HPLC of THPPmPEG12 and Mn-THPPmPEG12.


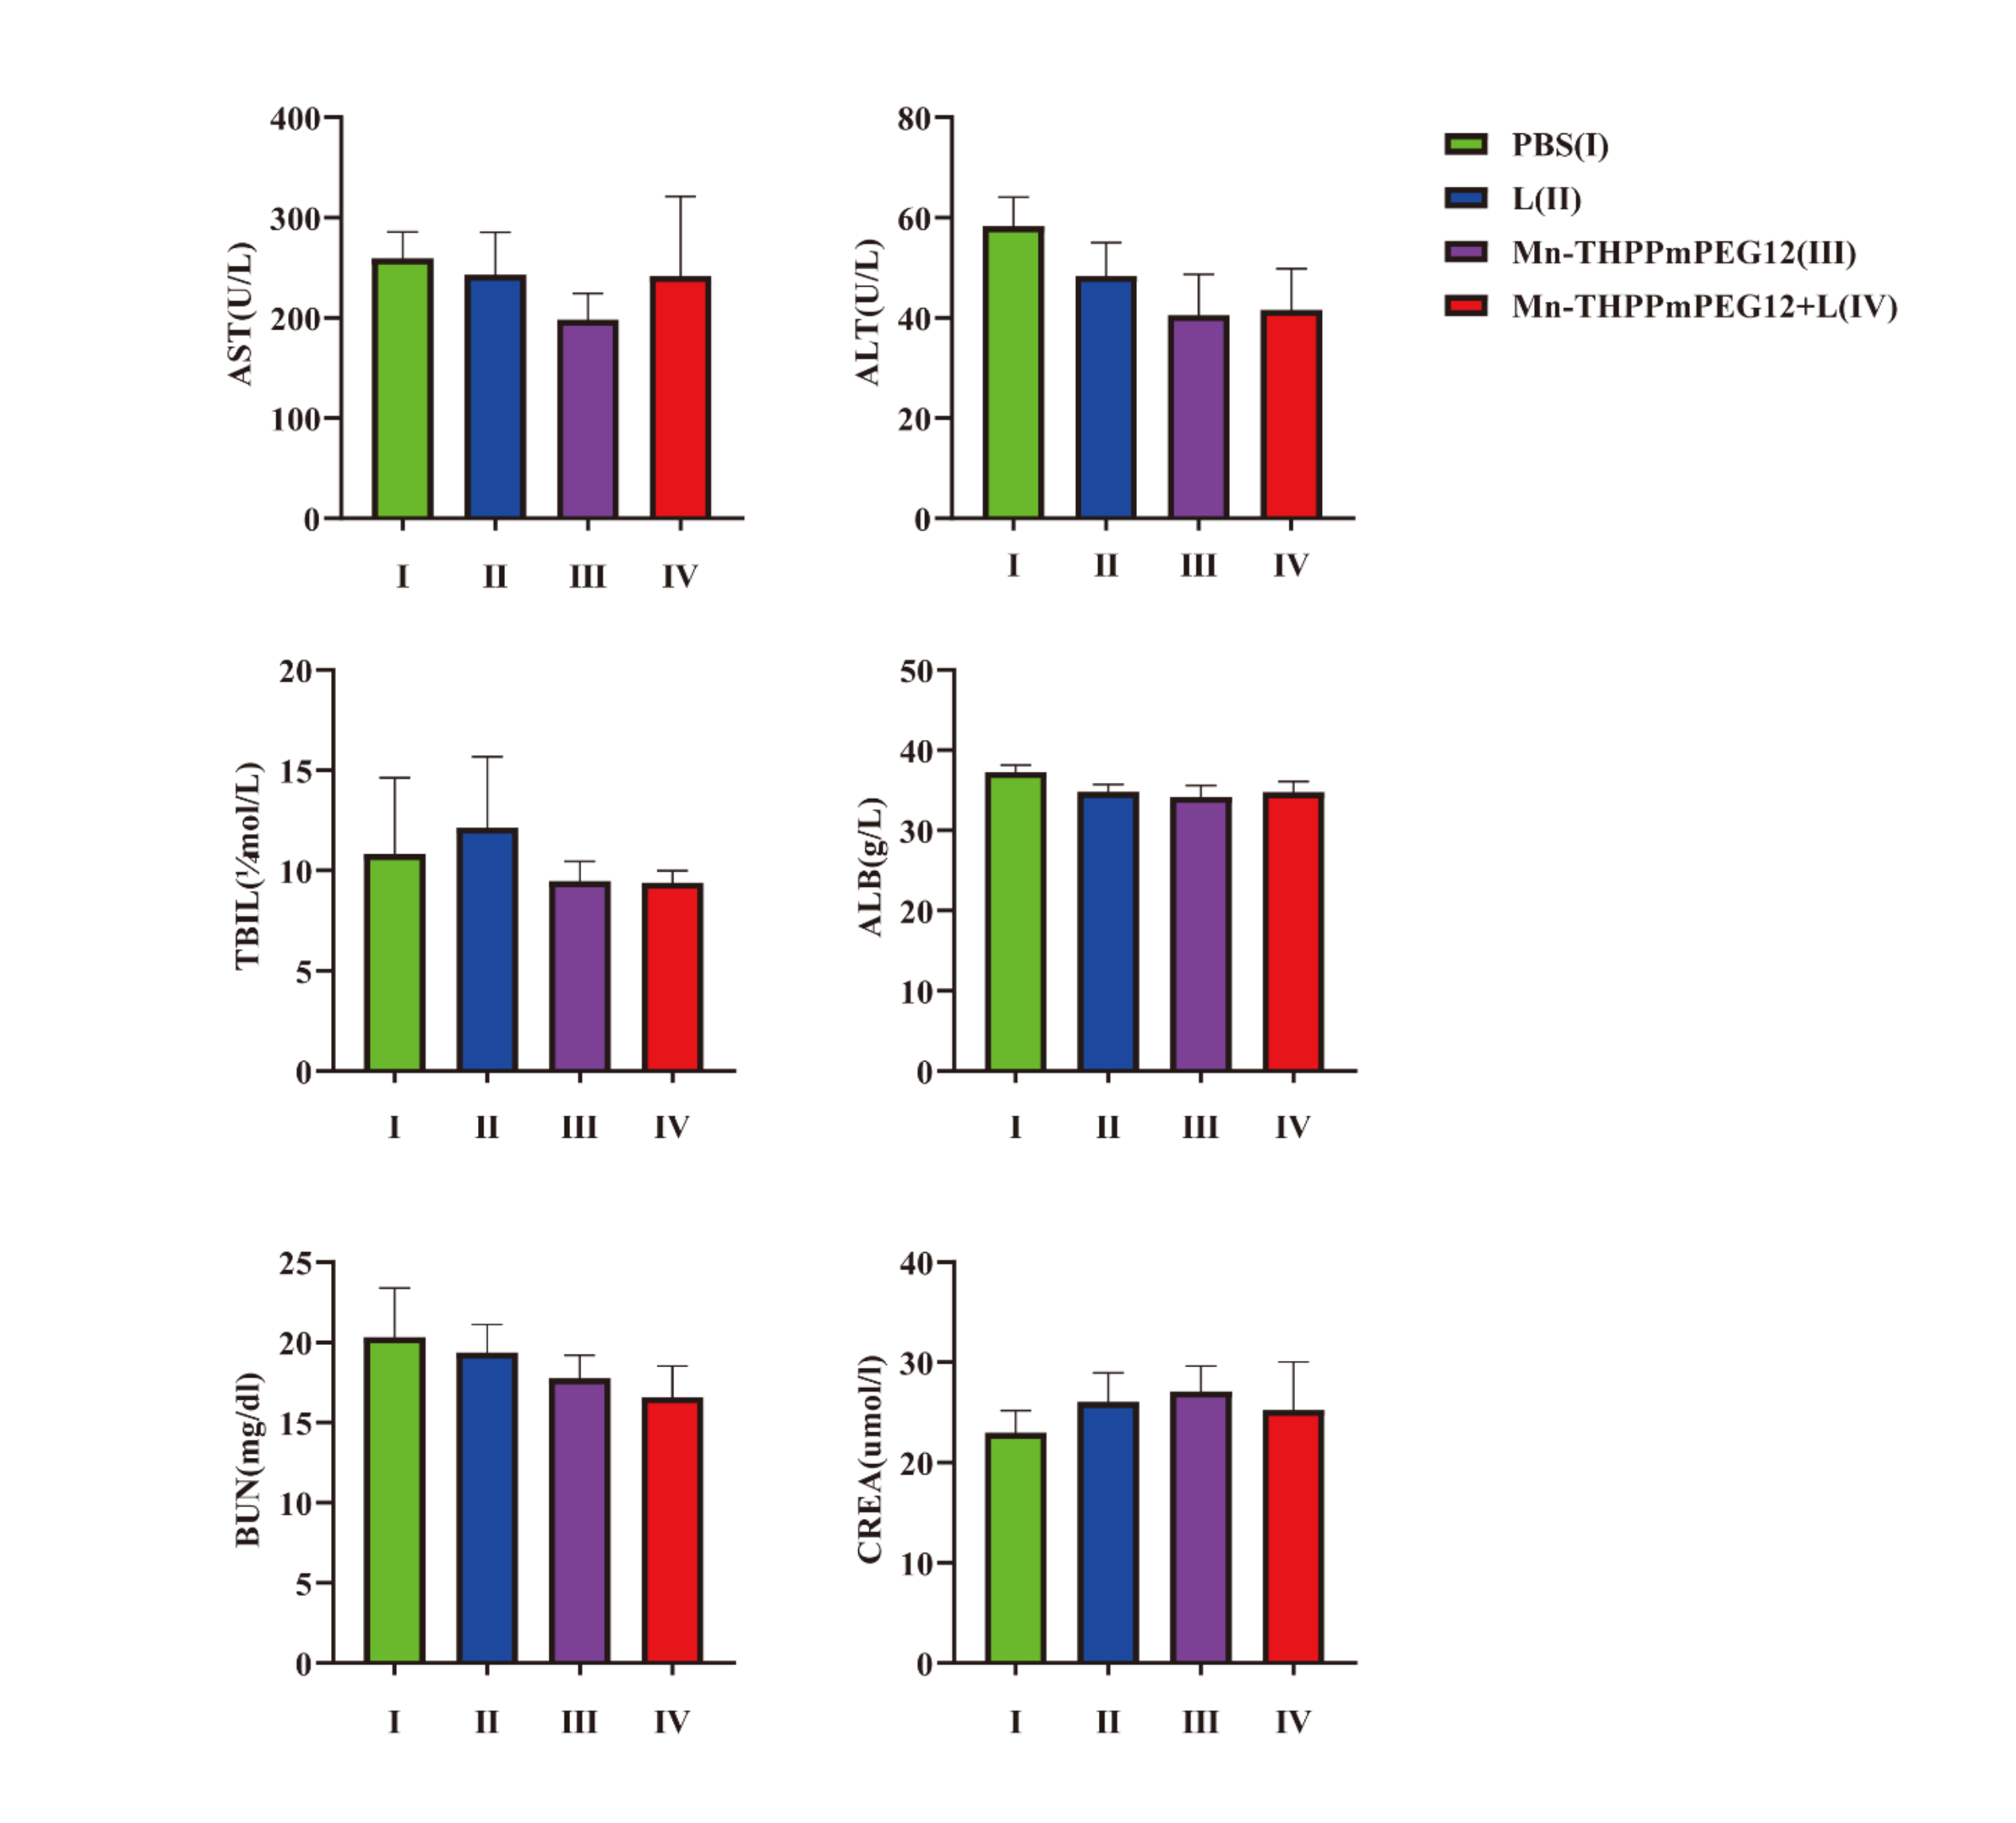


**Figure S6** The blood biochemical analysis for the PBS, Laser, Mn-THPPmPEG12 and Mn-THPPmPEG12+Laser groups at the study endpoint.

**Note:** Aspartate Aminotransferase (AST), Alanine Aminotransferase (ALT), Total Bilirubin (TBIL), Albumin (ALB), Blood Urea Nitrogen (BUN), Creatinine (CREA)
